# Supplementary material for: Genome-wide mapping of Myc binding and gene regulation in serum-stimulated fibroblasts
Source: PubMed Central journal article supplement — Oncogene. 2011 Aug 22;31(13):1695–709. doi: 10.1038/onc.2011.359 (PMC3324106; doi:10.1038/onc.2011.359), 2011-08-22

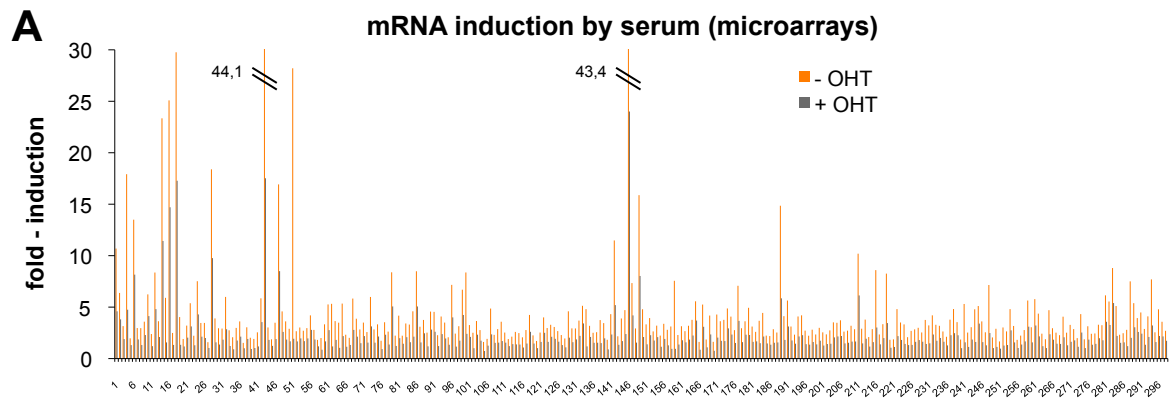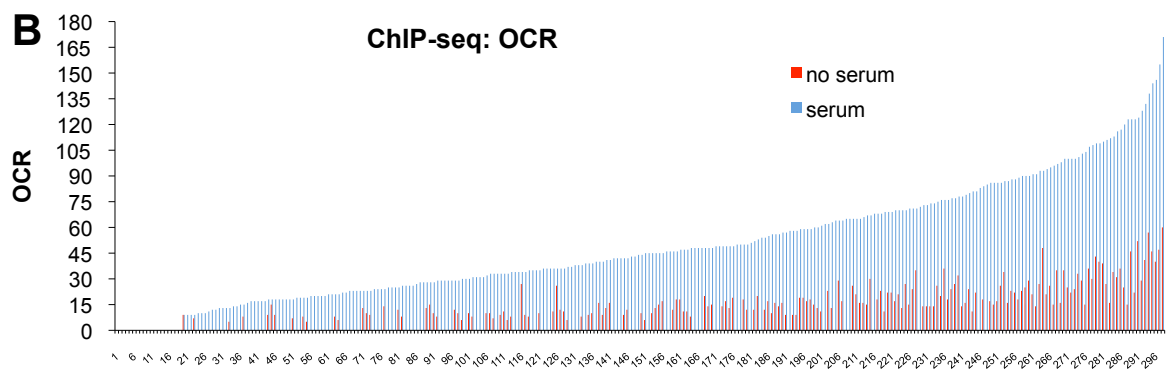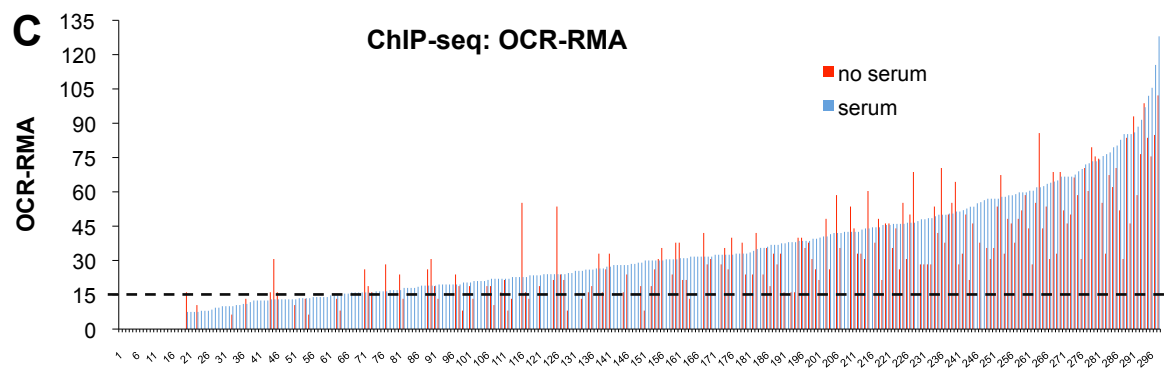

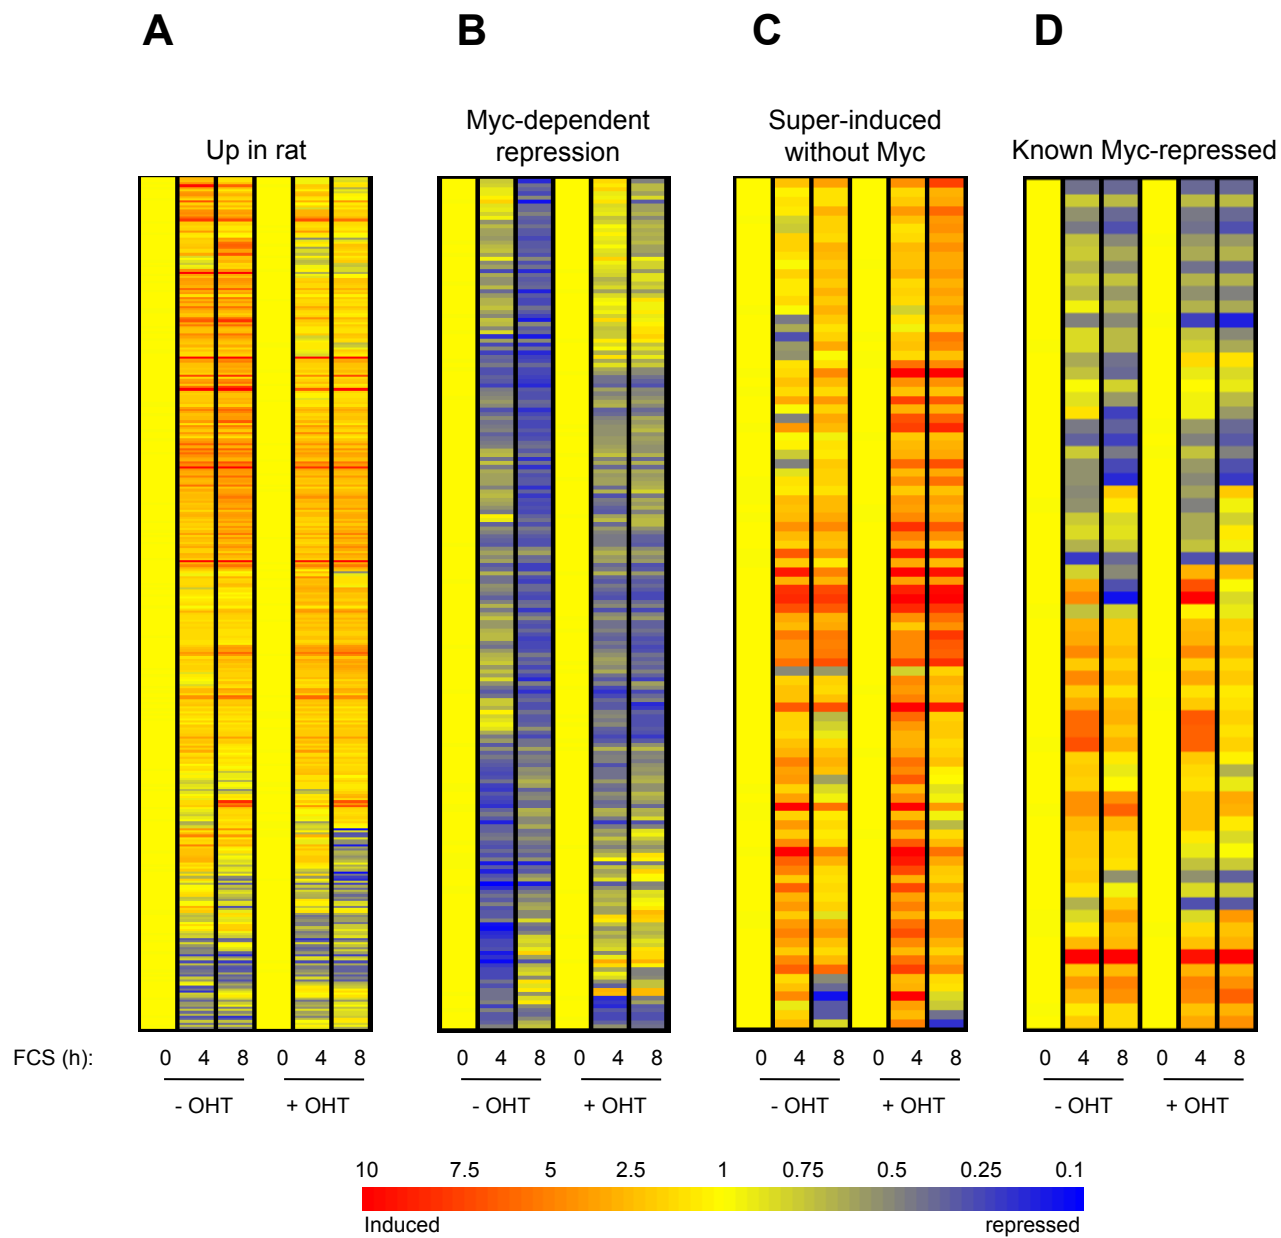

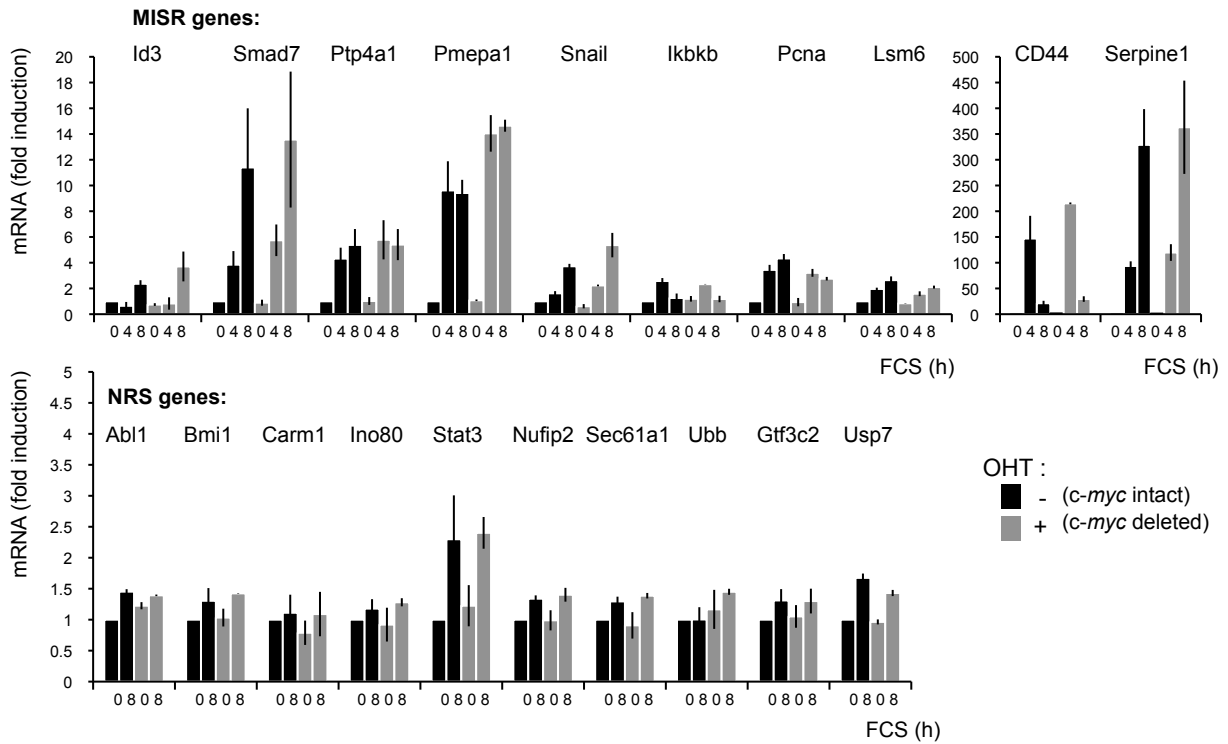

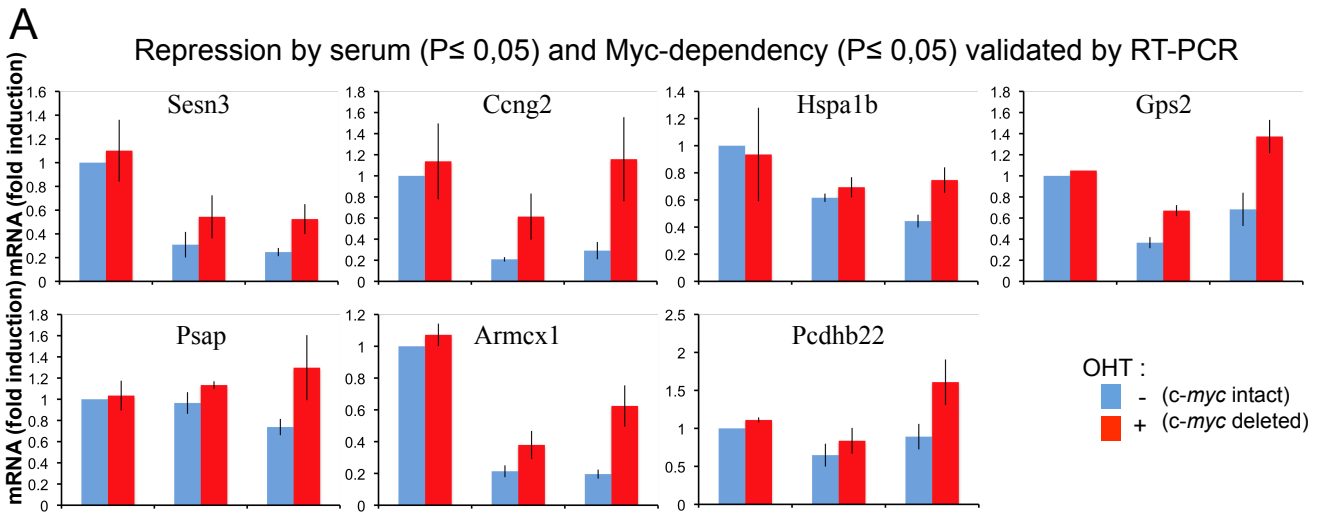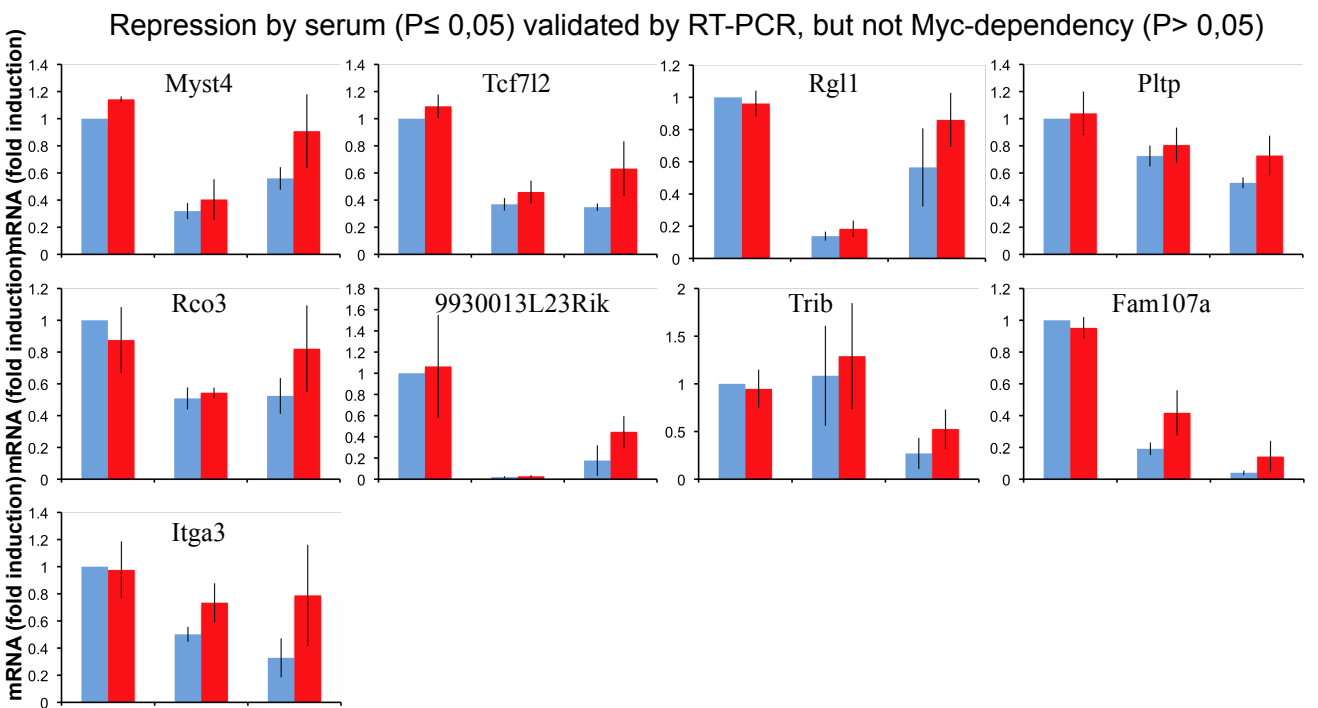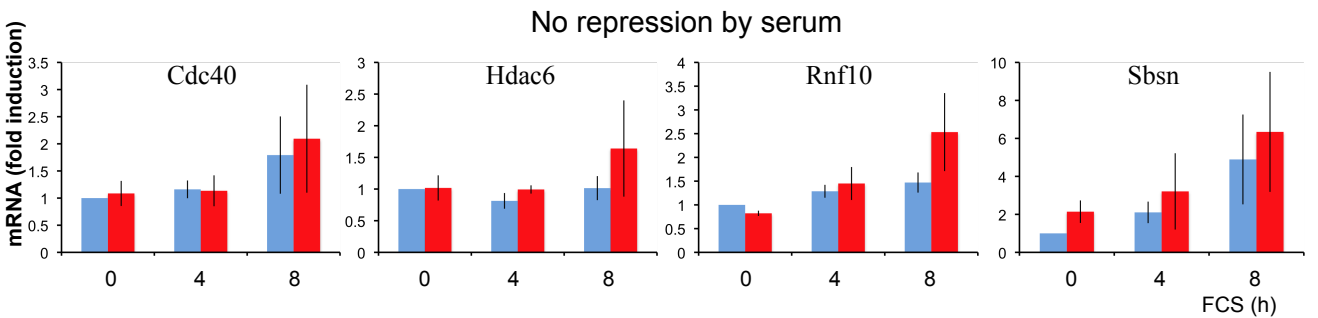

**B** Additional genes tested: repressed by serum ( $P \leq 0,05$ ) and Myc-dependent ( $P \leq 0,05$ )

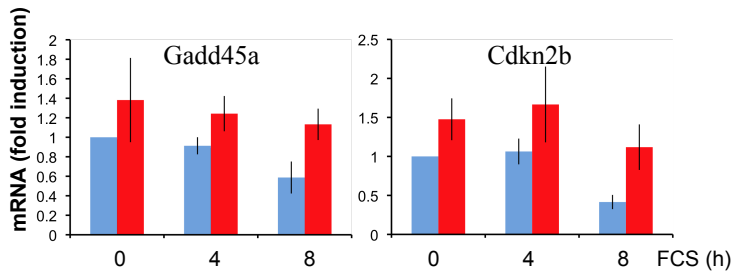

Myc-dependent super-induction by serum ( $P \leq 0,05$ ) validated by RT-PCR

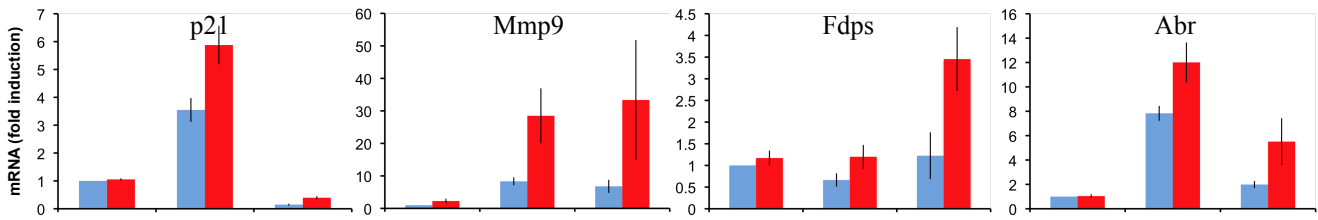

Myc-dependent super-induction by serum ( $P > 0,05$ ) not validated by RT-PCR

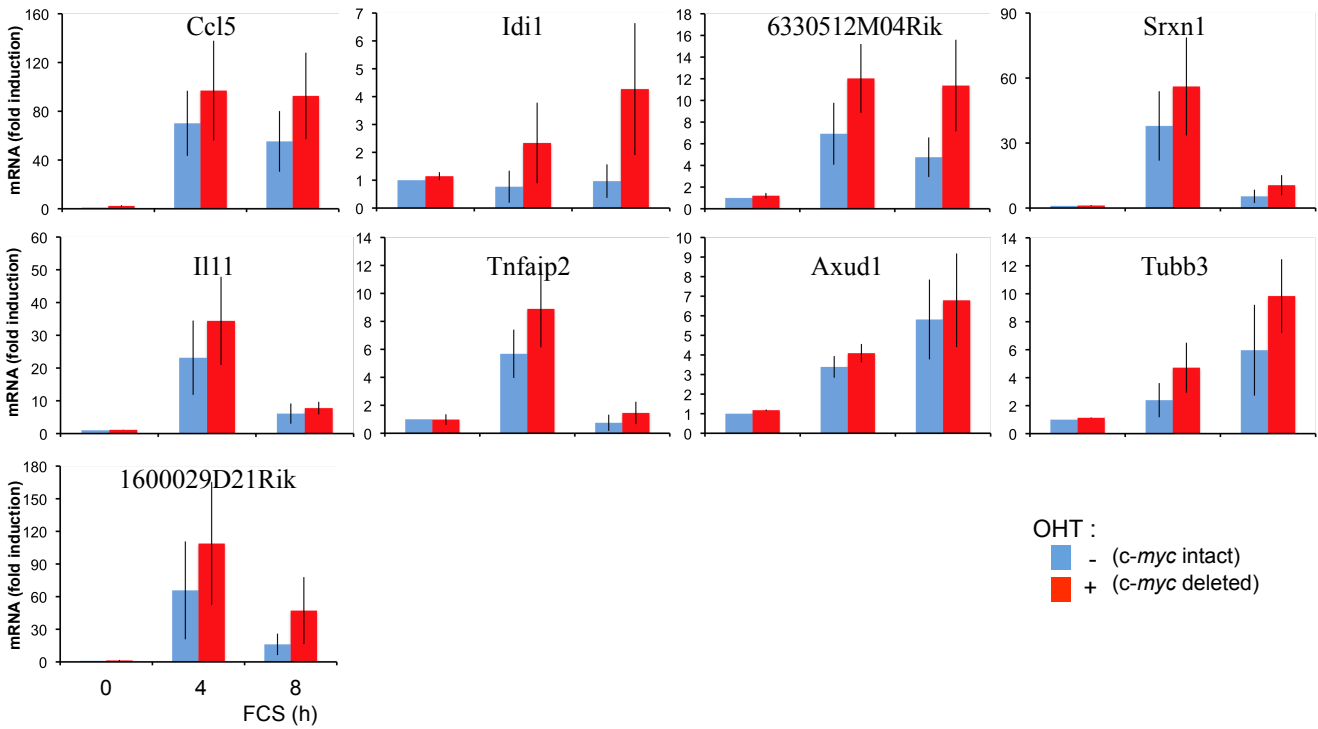

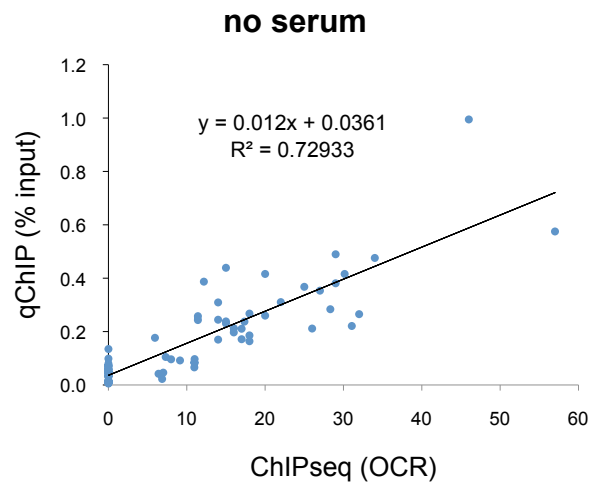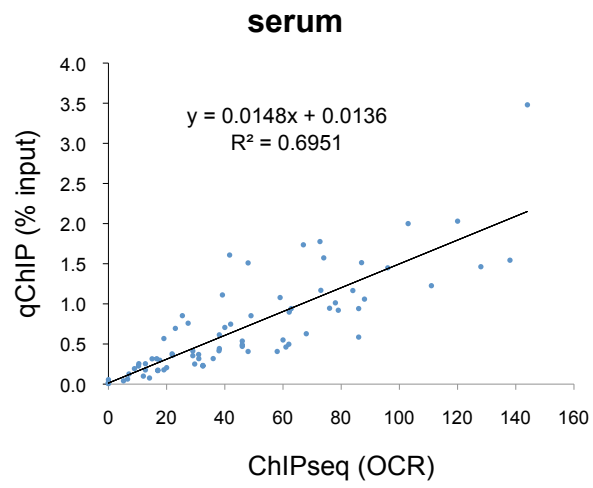

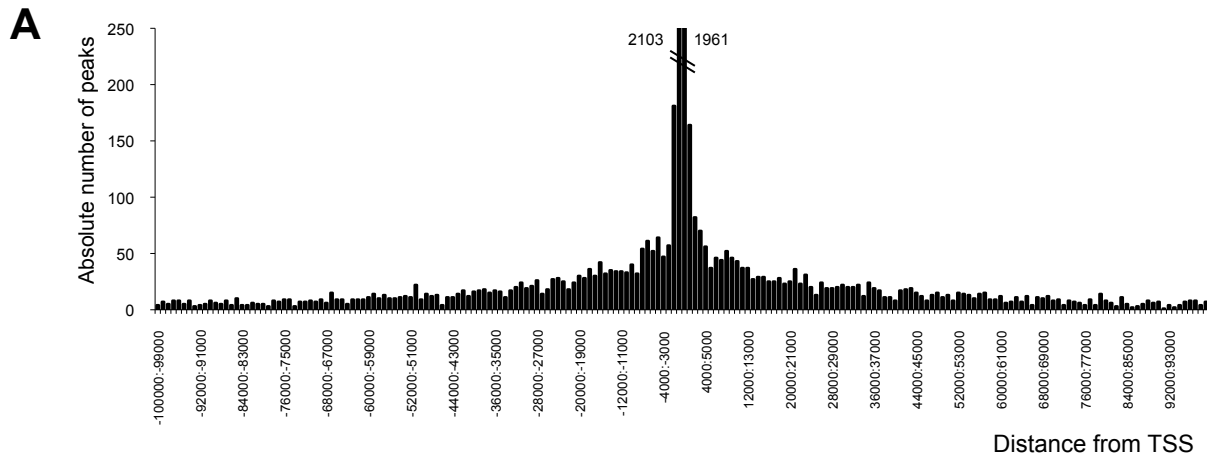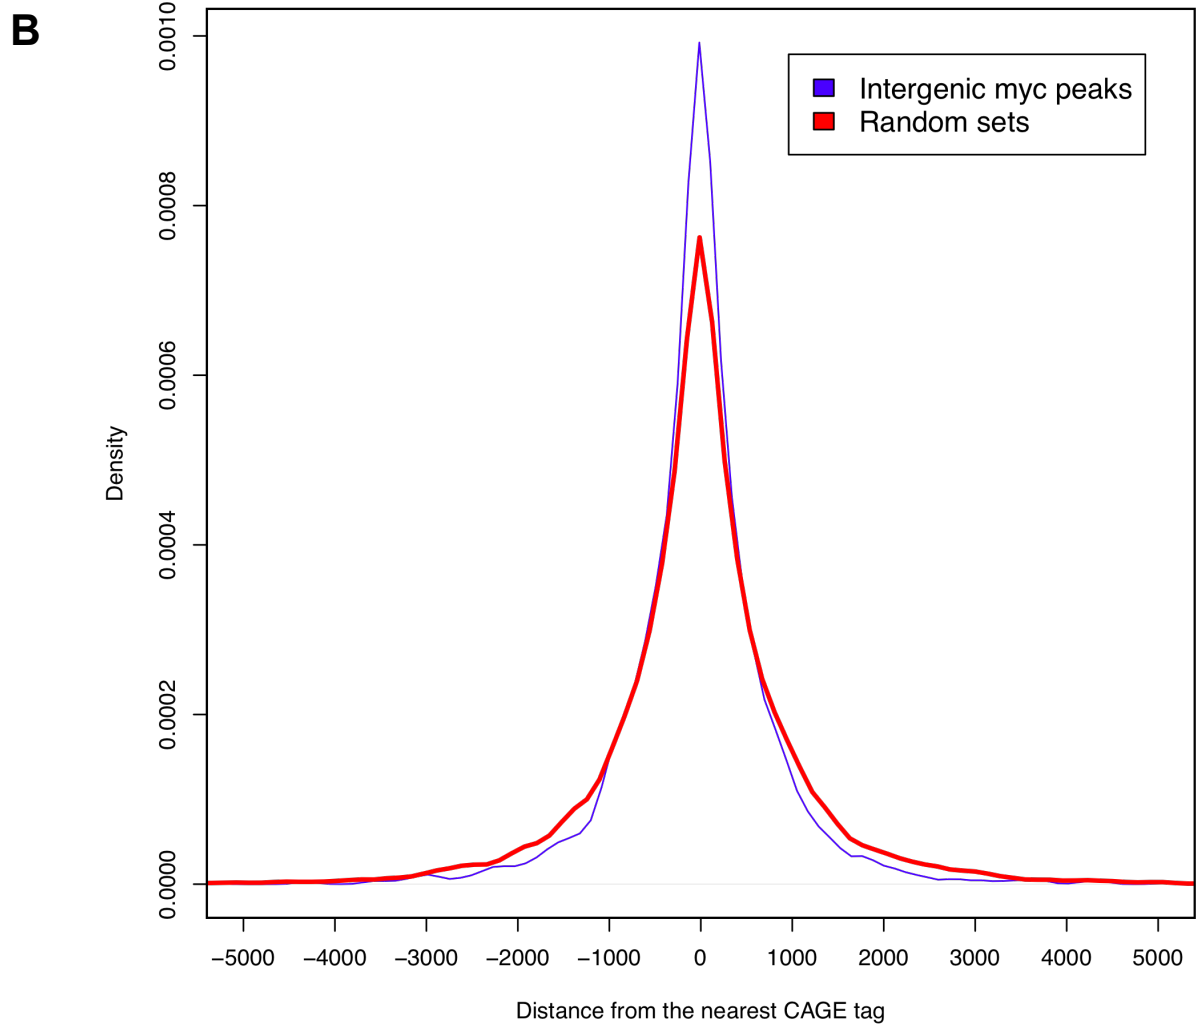

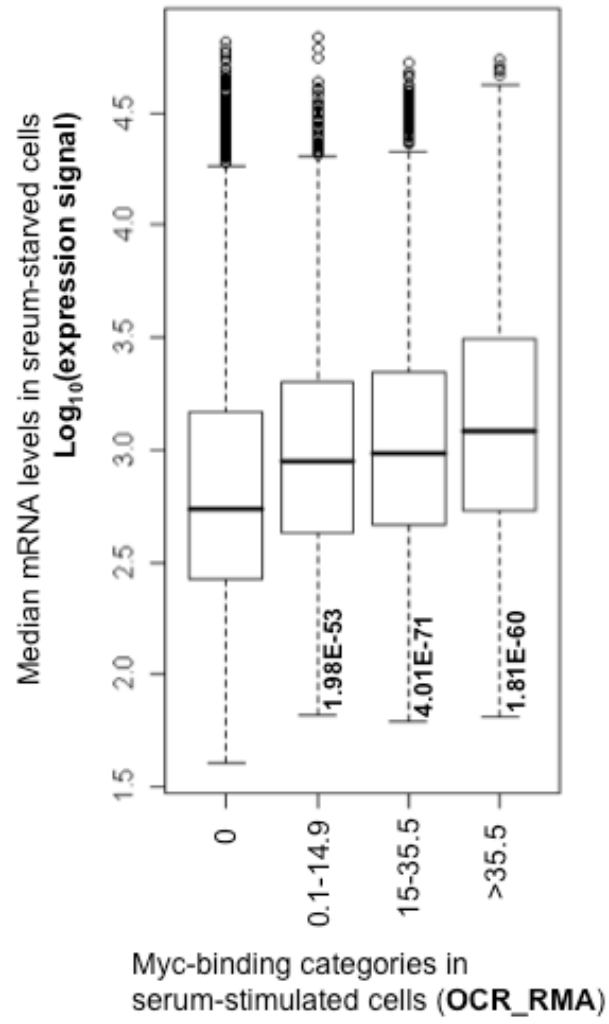

Supplement: onc2011359x1.pdf [file onc2011359x1.pdf]
